# Supplementary material for: In situ fluorescence visualizing of a temperature-dependent photoreaction process of pyridazine N-oxide
Source: Royal Society of Chemistry journal article supplement (doi:10.1039/d3qo00857f), 2023-01-01
Supplement: d3qo00857f1.pdf [file d3qo00857f1.pdf]

## Supporting Information

### ***In situ* fluorescence visualizing of temperature-dependent photoreaction process of pyridazine *N*-oxide**

Jianye Gong,<sup>‡a</sup> Junyi Gong,<sup>‡b</sup> Yumao He,<sup>a</sup> Chunbin Li,<sup>a</sup> Bo Yang,<sup>a</sup> Lingxiu Liu,<sup>a</sup> Guoyu Jiang,<sup>\*a</sup> and Jianguo Wang<sup>\*a</sup>

<sup>a</sup>College of Chemistry and Chemical Engineering, Inner Mongolia Key Laboratory of Fine Organic Synthesis, Inner Mongolia University, Hohhot 010021, P. R. China.

E-mail: jiangguoyu@mail.ipc.ac.cn; wangjg@iccas.ac.cn

<sup>b</sup>School of Science and Engineering, Shenzhen Institute of Aggregate Science and Technology, The Chinese University of Hong Kong, Shenzhen, Guangdong 518172, P. R. China.

## Table of Contents

|                                         |     |
|-----------------------------------------|-----|
| 1. Materials and instruments .....      | S3  |
| 2. Theoretical calculations .....       | S3  |
| 3. Synthesis and characterization ..... | S4  |
| 4. Supplementary Figures .....          | S6  |
| 5. Reference .....                      | S17 |

## 1. Materials and instruments

N,N-diphenyl-4-(4,4,5,5-tetramethyl-1,3,2-dioxaborolan-2-yl)aniline were purchased from Soochiral chemistry. 3,6-Dichloropyridazine and morpholine were purchased from Innochem. All other chemicals and reagents were purchased from Admas-beta® and used directly without further purification. <sup>1</sup>H and <sup>13</sup>C NMR spectra were recorded with a Bruker ARX 500 NMR spectrometer using tetramethylsilane (TMS) as a reference. High resolution mass spectra (HRMS) were measured with a LCMS9030 spectrometer. UV-vis absorption spectra were recorded on a SHIMADZU UV-2600i spectrophotometer. Photoluminescence (PL) spectra were recorded on a HITACHI F-4700 fluorescence spectrophotometer. The absolute fluorescence quantum yield was measured using a Hamamatsu quantum yield spectrometer C11347-11 Quantaury QY. Single crystal X-ray diffraction was performed on a Rigaku Oxford Diffraction Supernova Dual Source, Cu at Zero equipped with an AtlasS2 CCD using Cu K $\alpha$  radiation. The data were collected and processed using CrysAlisPro.

## 2. Theoretical calculations

In calculation of Gibbs free energy, the theoretical ground-state geometry and electronic structure of molecules were optimized using the density functional theory (DFT) at B3LYP/def2-SVP with program ORCA<sup>1</sup>. The HOMO and LUMO electron cloud distribution of MPZ and MPD-O in crystal were calculated at the level of B3LYP/6-311+G(d). The geometry of *trans*-MDO was optimized using B3LYP/6-311+G(d). All the theoretical calculations were performed using Gaussian 09 package.

### 3. Synthesis and characterization

**Synthesis of MPD-O:** MPD-O was synthesized according to the literature method.<sup>2</sup>

**Photosynthesis of MPZ:** To a 50 mL round-bottom flask was added MPD-O (106 mg, 0.25 mmol) dissolved in THF (5 mL). The resulting solution was stirred under irradiation from a 365 nm hand-held UV lamp for 3 h at room temperature for complete reaction. The resulting solution was concentrated under reduced pressure. The yellow residue was washed with CH<sub>2</sub>Cl<sub>2</sub> (3 mL). The resulting suspension was filtered to afford the title compound (81 mg, 76% yield) as a colorless powder. <sup>1</sup>H NMR (500 MHz, CDCl<sub>3</sub>), δ (ppm): 7.54 (d, *J* = 8.5 Hz, 2H), 7.30 (t, *J* = 8.4 Hz, 4H), 7.13 (t, *J* = 7.6 Hz, 6H), 7.08 (t, *J* = 7.4 Hz, 2H), 6.93 (s, 1H), 4.06 (s, 2H), 3.84 (s, 2H), 3.79 (s, 4H); <sup>13</sup>C NMR (126 MHz, CDCl<sub>3</sub>), δ (ppm): 161.75, 148.37, 147.31, 146.95, 129.41, 126.48, 124.79, 123.67, 123.44, 123.20, 104.18, 66.95, 47.59, 42.94; HRMS (ESI): *m/z*: [M+H]<sup>+</sup> calcd for [C<sub>26</sub>H<sub>25</sub>N<sub>4</sub>O<sub>2</sub>]<sup>+</sup>: 425.19775; found: 425.19720.

**Photosynthesis of *trans*-MDO:** To a 50 mL round-bottom flask was added MPD-O (43 mg, 0.1 mmol) dissolved in freshly distilled THF (5 mL). The resulting solution was stirred under irradiation from a 365 nm hand-held UV lamp for 4 d at -40 °C for complete reaction. The resulting solution was concentrated under reduced pressure. The crude product was purified by silica gel column chromatography using petroleum ether/ethyl acetate (*v:v*, 1:1) as an eluent to afford the title compound (26 mg, 63% yield) as a yellow powder. <sup>1</sup>H NMR (500 MHz, THF-*d*<sub>8</sub>), δ (ppm): 7.92 – 7.88 (m, 3H), 7.44 (d, *J* = 14.9 Hz, 1H), 7.32 (t, *J* = 8.4 Hz, 4H), 7.16 – 7.12 (m, 6H), 6.99 (d, *J* = 8.9 Hz, 2H), 3.61 (s, 8H); <sup>13</sup>C NMR (126 MHz, THF-*d*<sub>8</sub>), δ (ppm): 184.12, 161.43, 150.57, 144.65, 132.00, 129.17, 128.31, 127.98, 127.65, 124.14, 122.81, 117.51, 44.23, 40.34; HRMS (ESI): *m/z*: [M+H]<sup>+</sup> calcd for [C<sub>26</sub>H<sub>25</sub>N<sub>2</sub>O<sub>3</sub>]<sup>+</sup>: 413.18652; found: 413.18597.

*cis*-MDO: <sup>1</sup>H NMR (500 MHz, CDCl<sub>3</sub>), δ (ppm): 7.82 (d, *J* = 9.0 Hz, 2H), 7.35 (t, *J* = 7.7 Hz, 4H), 7.19 – 7.17 (m, 6H), 7.00 (t, *J* = 8.8 Hz, 2H), 6.52 (d, *J* = 12.0 Hz, 1H), 3.76 (s, 2H), 3.71 (s, 4H), 3.49 (s, 2H); HRMS (ESI): *m/z*: [M+H]<sup>+</sup> calcd for [C<sub>26</sub>H<sub>25</sub>N<sub>2</sub>O<sub>3</sub>]<sup>+</sup>: 413.18652; found: 413.18759.

**Photosynthesis of MF:** Following same procedure of *trans*-MDO, but resulting

solution was stirred under an atmosphere of N<sub>2</sub> and irradiated for 40 h at -40 °C. <sup>1</sup>H NMR (500 MHz, CDCl<sub>3</sub>), δ (ppm): 7.44 (d, *J* = 8.5 Hz, 2H), 7.29 – 7.26 (m, 4H), 7.13 (d, *J* = 7.7 Hz, 4H), 7.08 (d, *J* = 8.7 Hz, 2H), 7.04 (t, *J* = 7.4 Hz, 2H), 6.48 (d, *J* = 3.3 Hz, 1H), 5.29 (d, *J* = 2.8 Hz, 1H), 3.88 (t, *J* = 4.8 Hz, 4H), 3.20 (t, *J* = 4.3 Hz, 4H); HRMS (ESI): *m/z*: [M+H]<sup>+</sup> calcd for [C<sub>26</sub>H<sub>25</sub>N<sub>2</sub>O<sub>2</sub>]<sup>+</sup>: 397.19160; found: 397.19105.

## 4. Supplementary Figures

**Table S1.** Photophysical Properties of MPD-O, MPZ and *trans*-MDO.

|                         | $\lambda_{\text{abs}}$ (nm) |       | $\lambda_{\text{em}}$ (nm) |       | $\Phi_{\text{f}}^{\text{a}}$ (%) |       | $\tau_{\text{f}}$ (ns) | $k_{\text{fr}}^{\text{c}}$ ( $\text{s}^{-1}$ ) |
|-------------------------|-----------------------------|-------|----------------------------|-------|----------------------------------|-------|------------------------|------------------------------------------------|
|                         | Solution                    | Solid | Solution                   | Solid | Solution                         | Solid | Solution               | Solution                                       |
| <b>MPD-O</b>            | 388                         | 464   | 464                        | 464   | 1.1                              | 0.8   | 0.73                   | $1.64 \times 10^7$                             |
| <b>MPZ</b>              | 324                         | 391   | 407                        | 407   | 33.1                             | 9.2   | 0.28                   | $1.92 \times 10^8$                             |
| <b><i>trans</i>-MDO</b> | 392                         | 578   | 547                        | 547   | 5.3                              | 11.8  | 2.23                   | $3.58 \times 10^7$                             |

<sup>a</sup>  $\Phi_{\text{f}}$  = fluorescence quantum yield measured by using an integrating sphere

<sup>b</sup>  $\alpha_{\text{AIE}} = \Phi_{\text{f,solid}} / \Phi_{\text{f,solution}}$

<sup>c</sup>  $k_{\text{fr}} = \Phi_{\text{f}} / \tau_{\text{f}}$

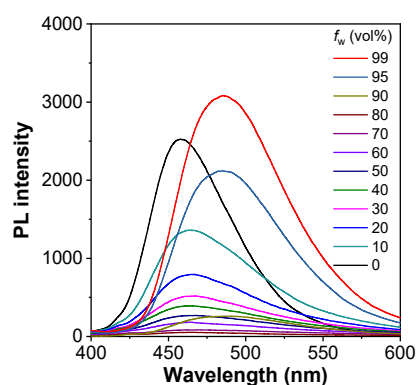

**Figure S1.** PL spectra of MPD-O in THF/water mixtures with different water fractions ( $f_{\text{w}}$ ).

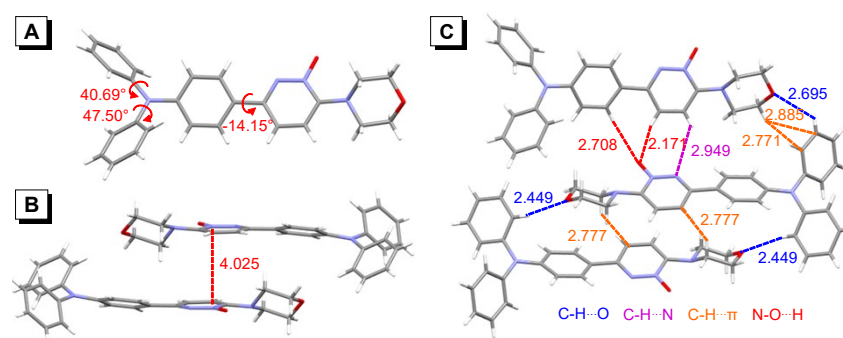

**Figure S2.** (A) The torsion angles in the MPD-O single crystal. (B) The distance between the two adjacent pyridazine *N*-oxide rings. (C) Intermolecular interactions of MPD-O.

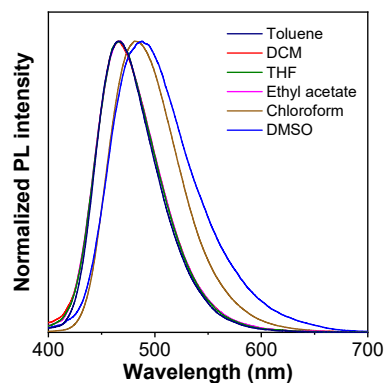

**Figure S3.** Normalized PL spectra of MPD-O in different solvents.

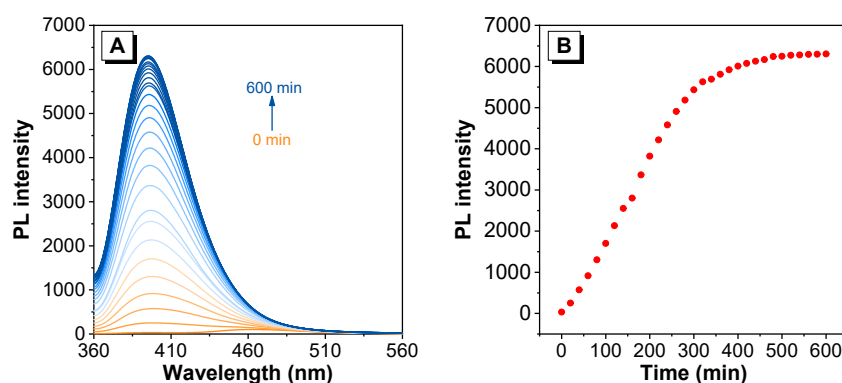

**Figure S4.** (A) PL spectra of MPD-O after different time of UV irradiation by the xenon lamp of the fluorescence spectrometer at room temperature. (B) Plot of the PL intensity at 395 nm versus irradiation time.

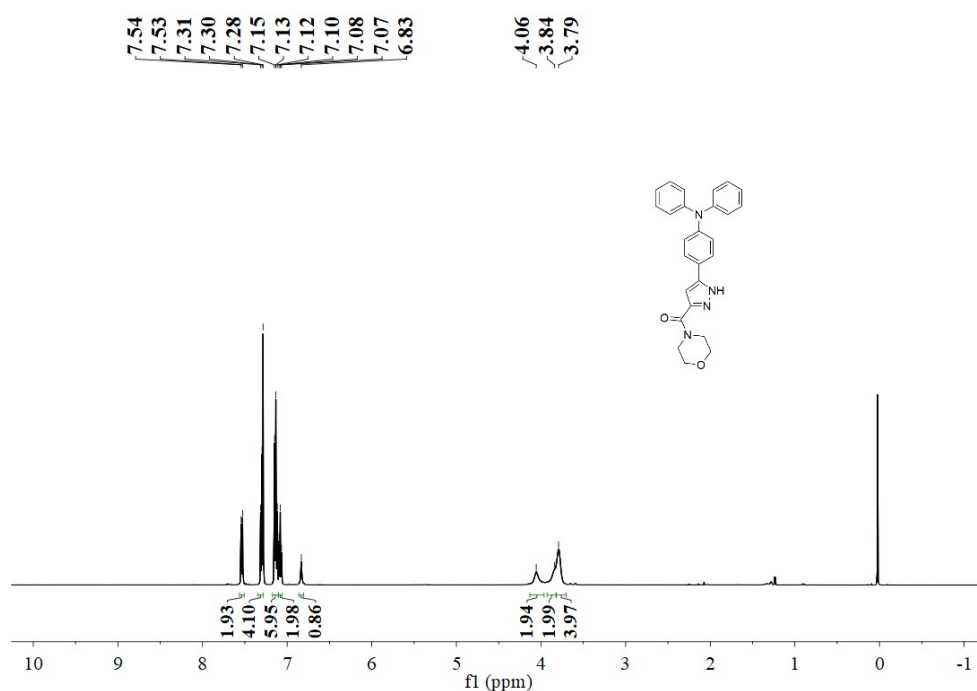

**Figure S5.**  $^1\text{H}$  NMR spectrum of MPZ in  $\text{CDCl}_3$ .

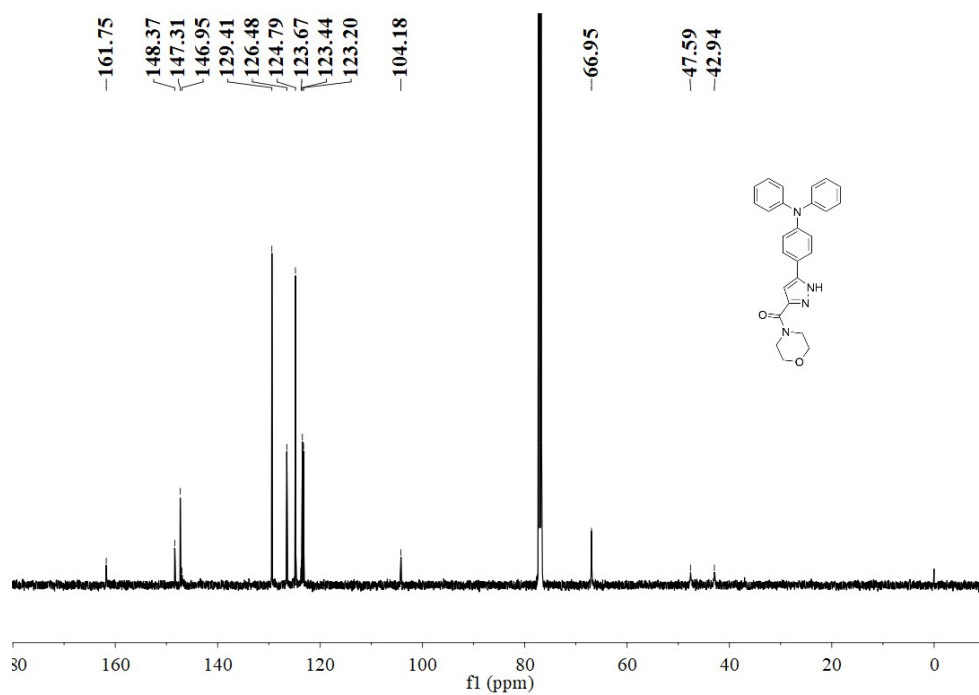

Figure S6.  $^{13}\text{C}$  NMR spectrum of MPZ in  $\text{CDCl}_3$ .

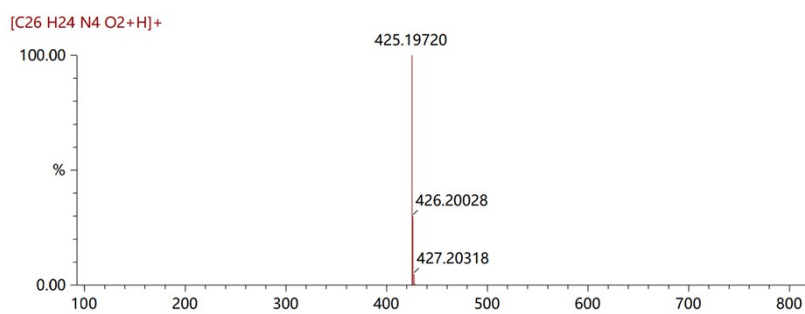

Figure S7. HRMS spectrum of MPZ.

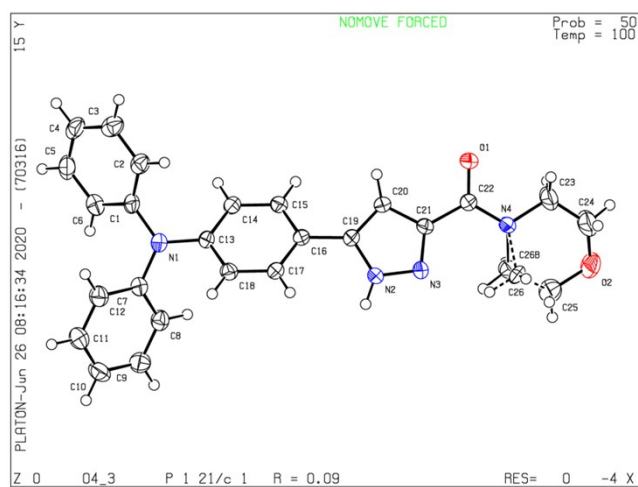

Figure S8. Single structure of MPZ.



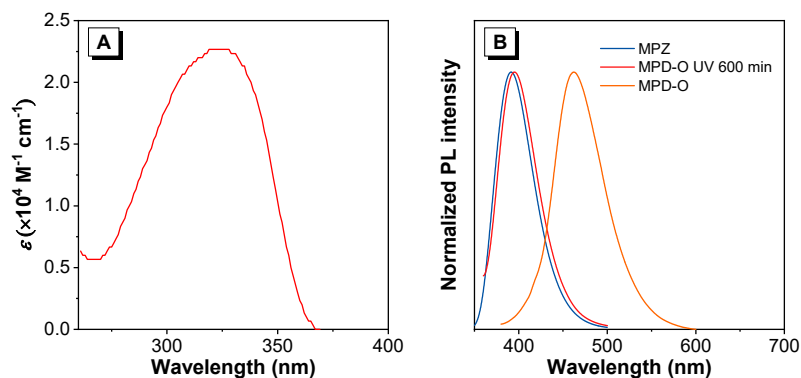

**Figure S9.** (A) Molar extinction coefficient of MPZ in THF (30  $\mu\text{M}$ ). (B) Normalized PL spectra of MPZ, MPD-O and MPD-O after UV irradiation 600 min.

**Table S2.** Crystallographic and structural refinement data of MPZ.

| Name                                             | MPZ                                                              |
|--------------------------------------------------|------------------------------------------------------------------|
| Empirical formula                                | $\text{C}_{26}\text{H}_{24}\text{N}_4\text{O}_2$                 |
| Formula weight                                   | 424.49                                                           |
| Temperature (K)                                  | 100.0(3)                                                         |
| Wavelength ( $\text{\AA}$ )                      | 1.54184                                                          |
| Crystal system                                   | monoclinic                                                       |
| Space group                                      | $\text{P}2_1/\text{c}$                                           |
| a ( $\text{\AA}$ )                               | 21.4658(15)                                                      |
| b ( $\text{\AA}$ )                               | 11.4890(6)                                                       |
| c ( $\text{\AA}$ )                               | 8.7489(5)                                                        |
| $\alpha$ ( $^\circ$ )                            | 90                                                               |
| $\beta$ ( $^\circ$ )                             | 95.255(6)                                                        |
| $\gamma$ ( $^\circ$ )                            | 90                                                               |
| Volume ( $\text{\AA}^3$ )                        | 2148.6(2)                                                        |
| Z                                                | 4                                                                |
| $2\theta$ range for data collection ( $^\circ$ ) | 4.134 to 146.896                                                 |
| Index ranges                                     | $-26 \leq h \leq 25$ , $-14 \leq k \leq 9$ , $-10 \leq l \leq 8$ |
| CCDC Number                                      | 2210453                                                          |

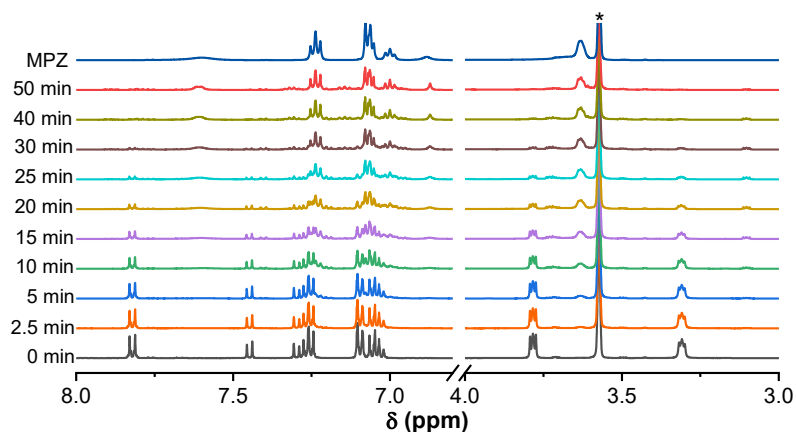

**Figure S10.**  $^1\text{H}$  NMR spectrum of MPD-O in  $\text{THF-}d_8$  at different time of UV irradiation by a hand-held UV lamp at room temperature.

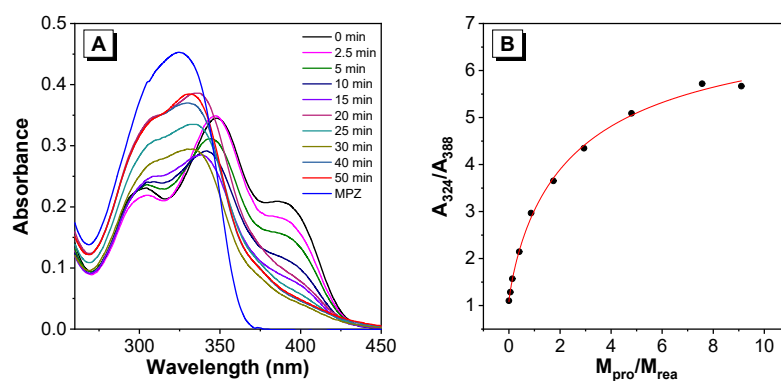

**Figure S11.** (A) UV-vis absorption spectra of MPD-O in THF at different irradiation time points. (B) The functional relationship between the absorbance ratio ( $A_{324}/A_{388}$ ) and the molar ratio of product ( $M_{\text{pro}}$ ) versus reactant ( $M_{\text{rea}}$ ) calculated from  $^1\text{H}$  NMR data.  $Y = 7.411 - 6.33/(1 + (X/2.61)^{0.85})$ ,  $R^2 = 0.997$ .

**Table S3.** The molar ratio of the reaction product ( $M_{\text{pro}}$ ) to the reactant ( $M_{\text{rea}}$ ) was calculated based on  $^1\text{H}$  NMR at different reaction times.  $M_{\text{pro}}/M_{\text{rea}} = \text{integral of } 7.649 - 7.563 \text{ ppm of product} / \text{integral of } 7.839 - 7.800 \text{ ppm of reactant}$ .

| Time (min)                      | 0 | 2.5   | 5     | 10    | 15    | 20    | 25    | 30    | 40    | 50    |
|---------------------------------|---|-------|-------|-------|-------|-------|-------|-------|-------|-------|
| $M_{\text{pro}}/M_{\text{rea}}$ | 0 | 0.005 | 0.135 | 0.405 | 0.870 | 1.745 | 2.940 | 4.805 | 7.570 | 9.015 |

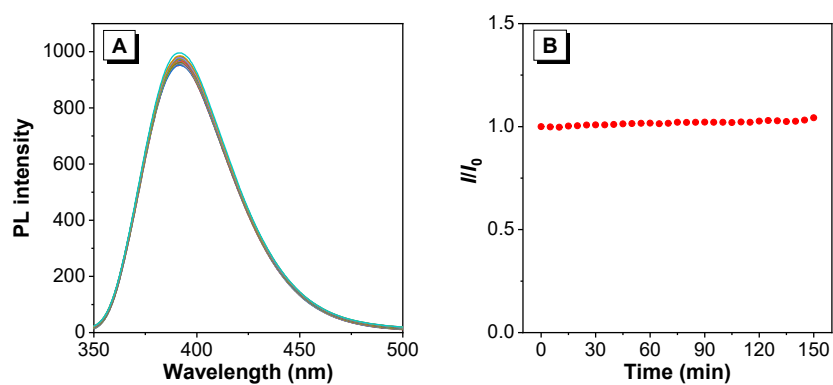

**Figure S12.** (A) Photostability of MPZ in THF. (B) Plot of the relative emission intensity ( $I/I_0$ ) versus irradiation time.

**Table S4.** The corresponding CIE coordinates of MPD-O at different time in the photoreaction at low temperature of  $-40\text{ }^\circ\text{C}$ .

| Time (min) | CIE coordinate | Time (min) | CIE coordinate |
|------------|----------------|------------|----------------|
| 0          | (0.186, 0.203) | 12         | (0.193, 0.173) |
| 2          | (0.158, 0.041) | 14         | (0.205, 0.216) |
| 4          | (0.160, 0.053) | 16         | (0.219, 0.267) |
| 6          | (0.164, 0.068) | 18         | (0.232, 0.306) |
| 8          | (0.170, 0.091) | 20         | (0.242, 0.338) |
| 10         | (0.177, 0.116) | 22         | (0.247, 0.354) |

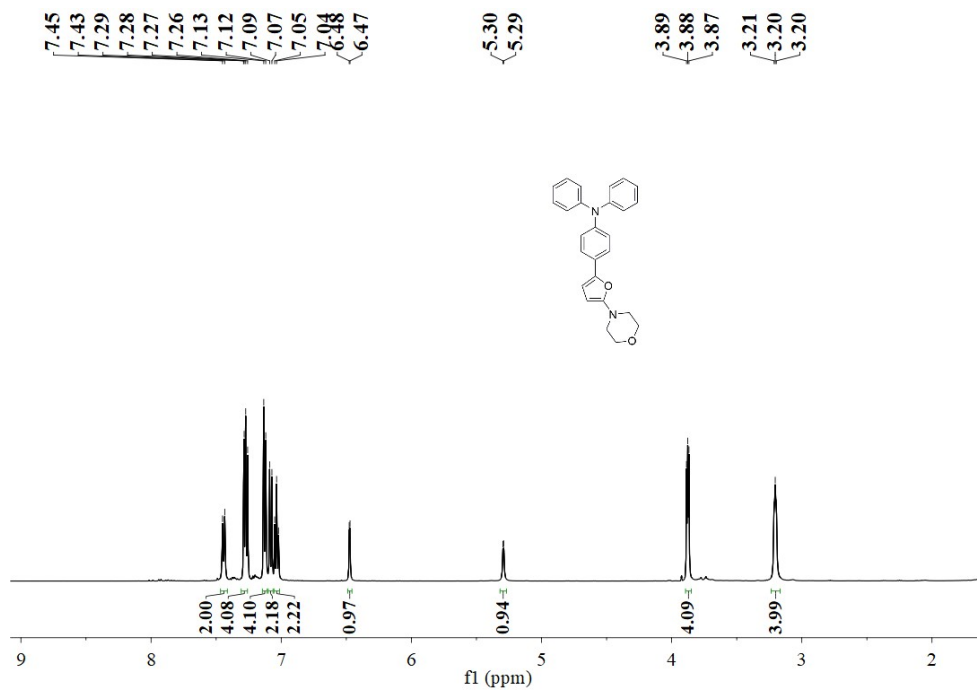

**Figure S13.**  $^1\text{H}$  NMR spectrum of MF in  $\text{CDCl}_3$ .

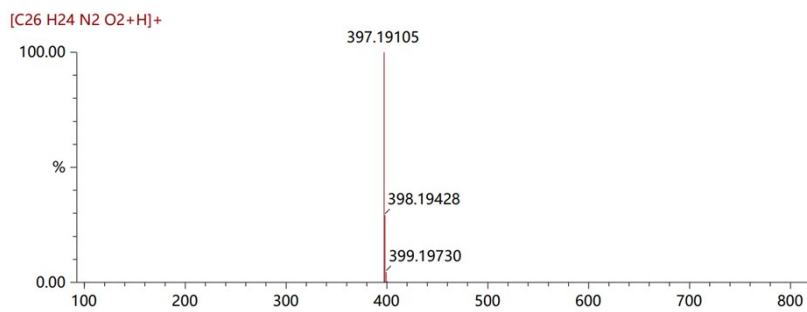

**Figure S14.** HRMS spectrum of MF.

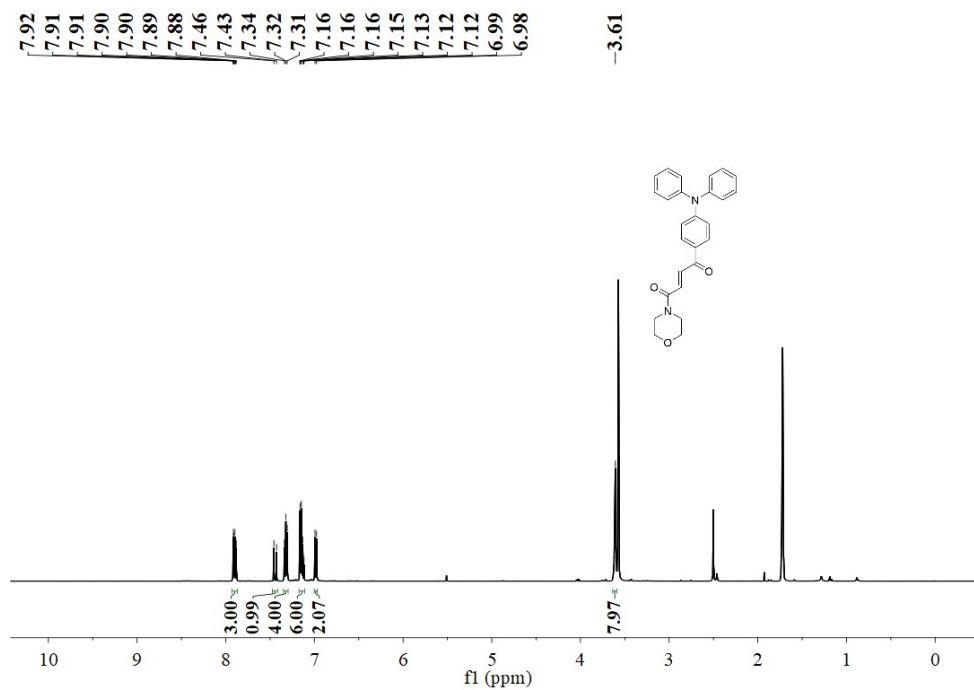

Figure S15.  $^1\text{H}$  NMR spectrum of *trans*-MDO in  $\text{THF-}d_8$ .

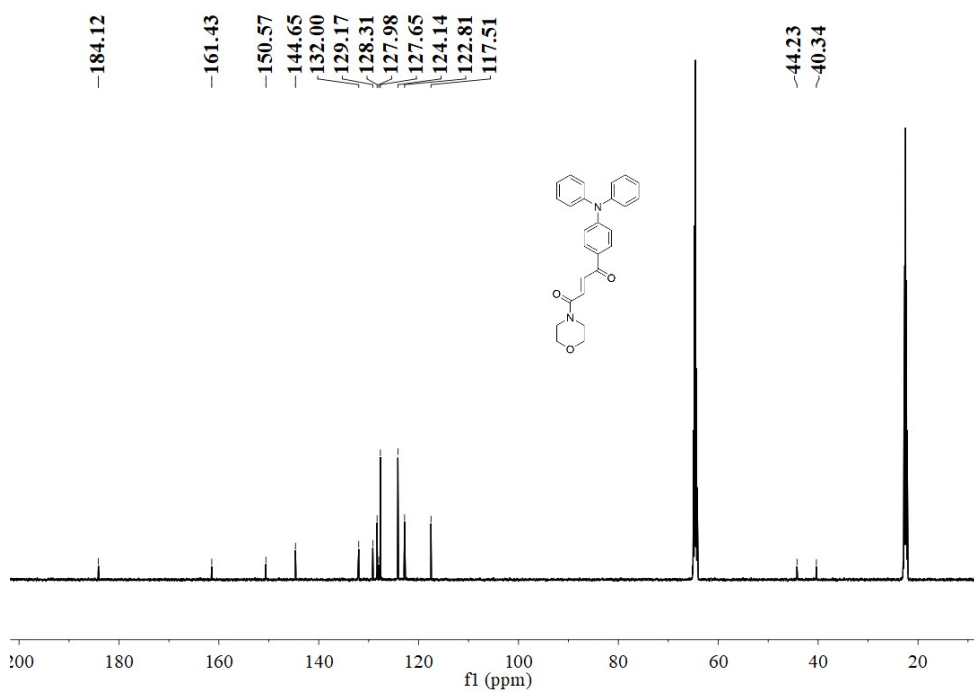

Figure S16.  $^{13}\text{C}$  NMR spectrum of *trans*-MDO in  $\text{THF-}d_8$ .

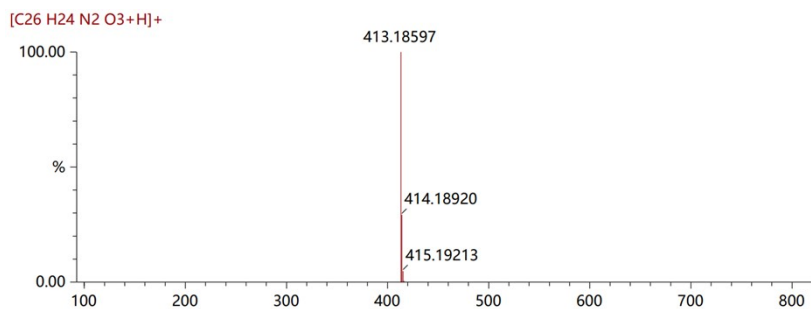

**Figure S17.** HRMS spectrum of *trans*-MDO.

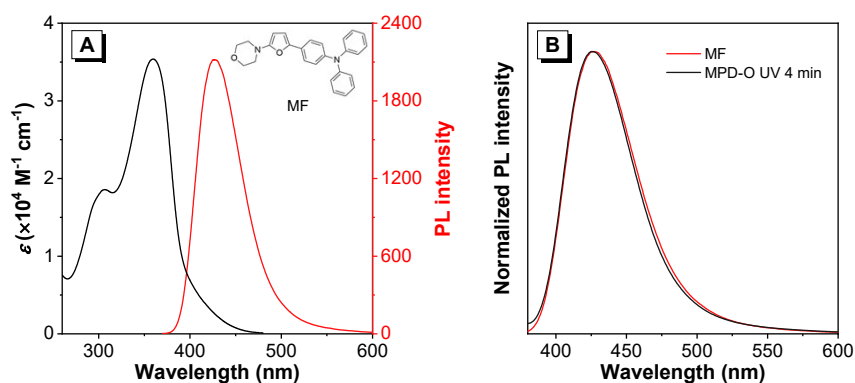

**Figure S18.** (A) Molar extinction coefficient and PL spectra of MF (30  $\mu\text{M}$ ) in THF. Inset: the structure of MF. (B) Normalized PL spectra of MF and MPD-O after UV irradiation of 4 min.

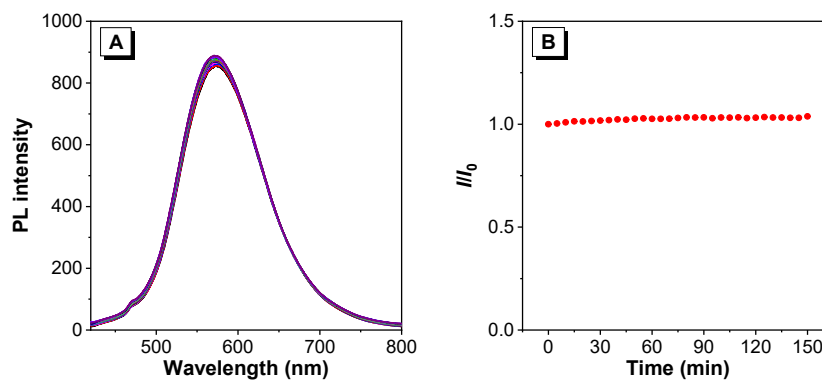

**Figure S19.** (A) Photostability of *trans*-MDO in THF. (B) Plot of the relative emission intensity ( $I/I_0$ ) versus irradiation time.

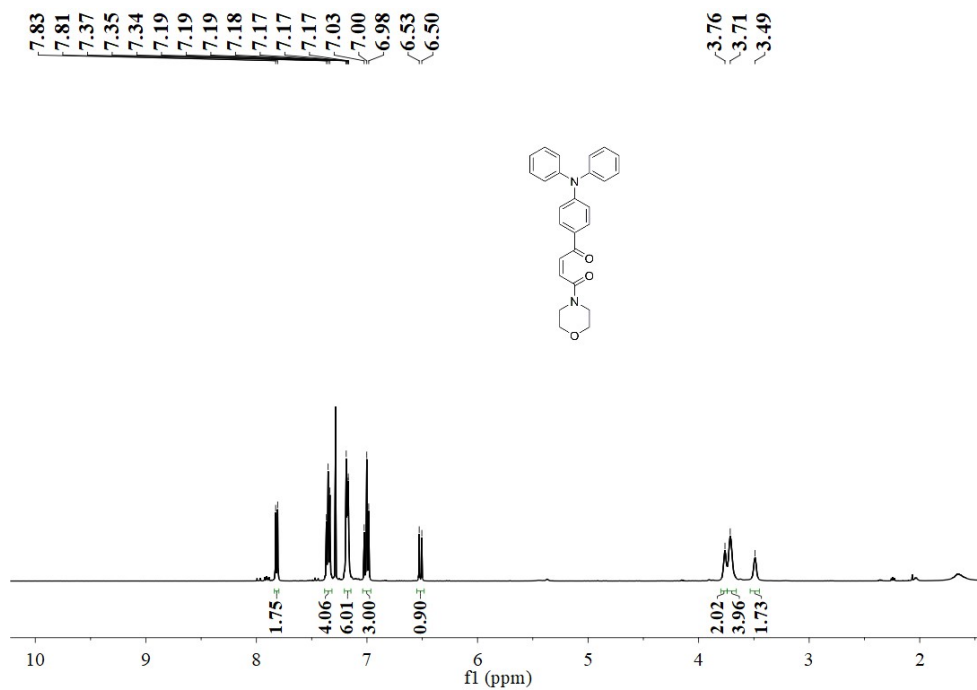

**Figure S20.** <sup>1</sup>H NMR spectrum of *cis*-MDO in CDCl<sub>3</sub>.

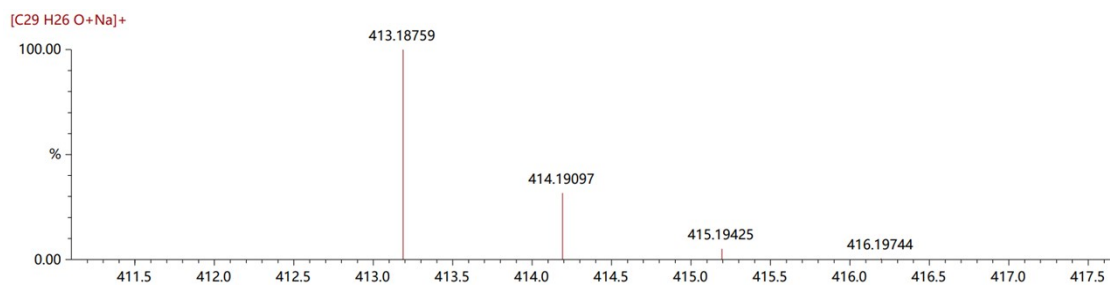

**Figure S21.** HRMS spectrum of *cis*-MDO.

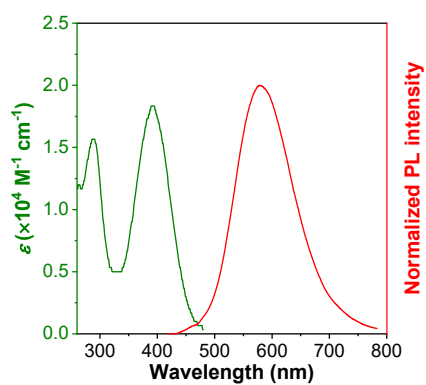

**Figure S22.** Molar extinction coefficient and PL spectra of *trans*-MDO (30 μM) in THF solution.

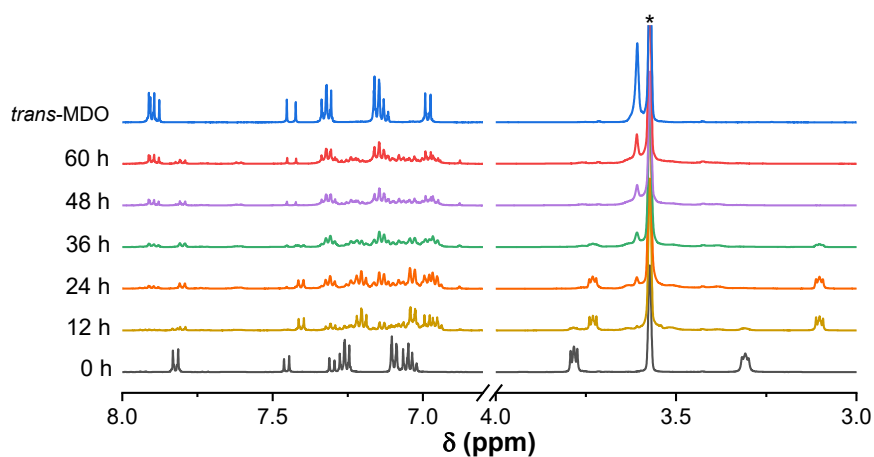

**Figure S23.**  $^1\text{H}$  NMR spectra of MPD-O in  $\text{THF-}d_8$  at different time of UV irradiation by a hand-held UV lamp at  $-40\text{ }^\circ\text{C}$ .

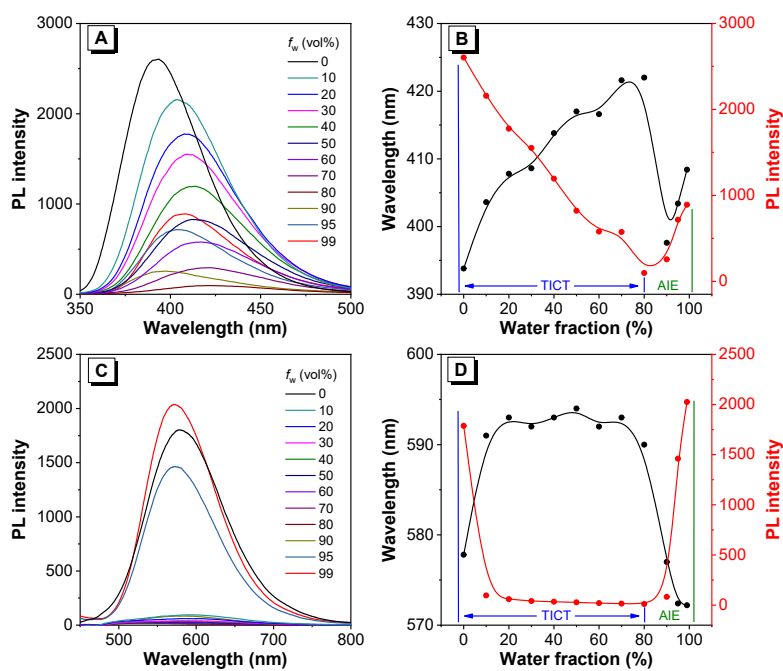

**Figure S24.** PL spectra of MPZ (A) and *trans*-MDO (C) in THF/water mixtures with different water fractions ( $f_w$ ). Plot of maximal emission wavelength and PL intensity of MPZ (B) and *trans*-MDO (D) versus the water fraction in the THF/water mixtures.



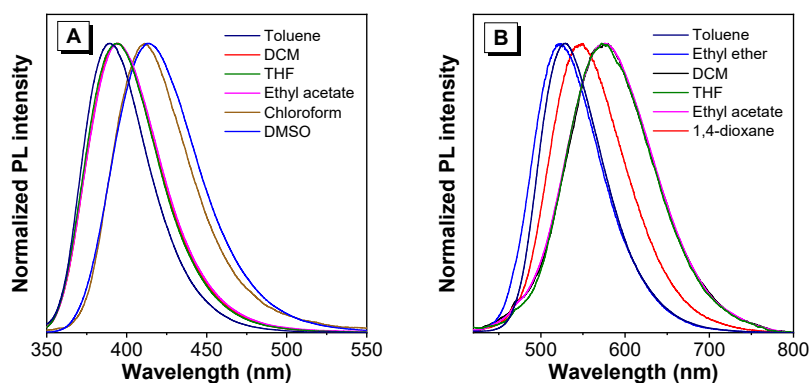

**Figure S25.** Normalized PL spectra of MPZ (A) and *trans*-MDO (B) in different solvents.

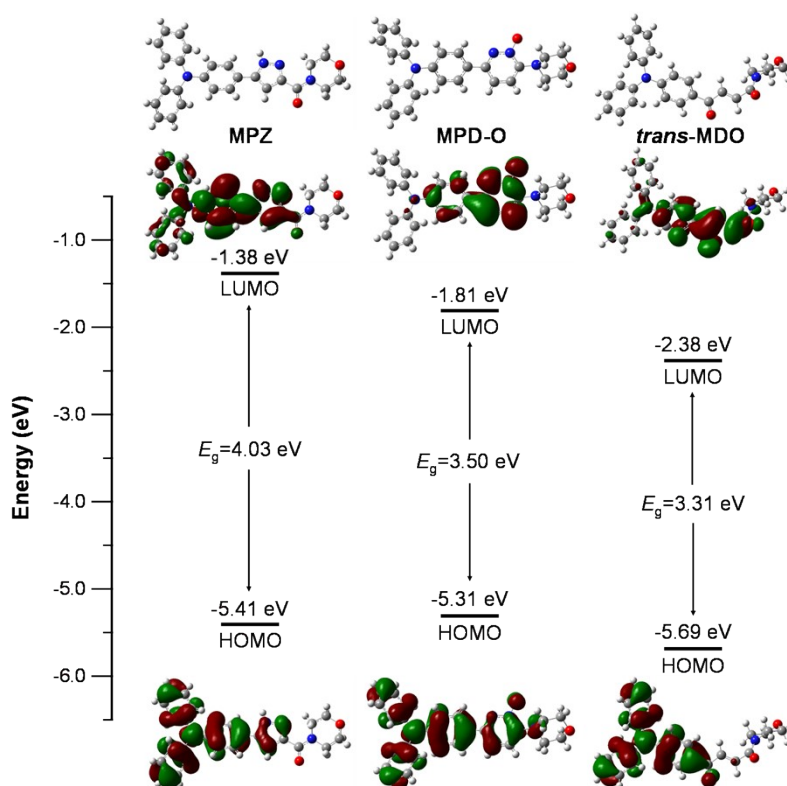

**Figure S26.** The HOMO and LUMO electron cloud distribution of MPZ, MPD-O, and *trans*-MDO.

## 5. Reference

1. F. Neese, The ORCA program system. *Wiley Interdiscip. Rev.: Comput. Mol. Sci.* 2012, **2**, 73.
2. J. Gong, L. Liu, C. Li, Y. He, J. Yu, Y. Zhang, L. Feng, G. Jiang, J. Wang and B. Z. Tang, Oxidization enhances type I ROS generation of AIE-active zwitterionic photosensitizers for photodynamic killing of drug-resistant bacteria, *Chem. Sci.*, 2023, **14**, 4863-4871.
